# Supplementary material for: Modularity and diversity of target selectors in Tn7 transposons
Source: PubMed Central journal article supplement (PMC10293859; doi:10.1016/j.molcel.2023.05.013), 2023-06-15

**A**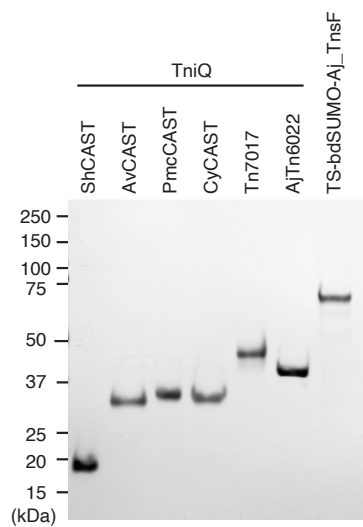**B**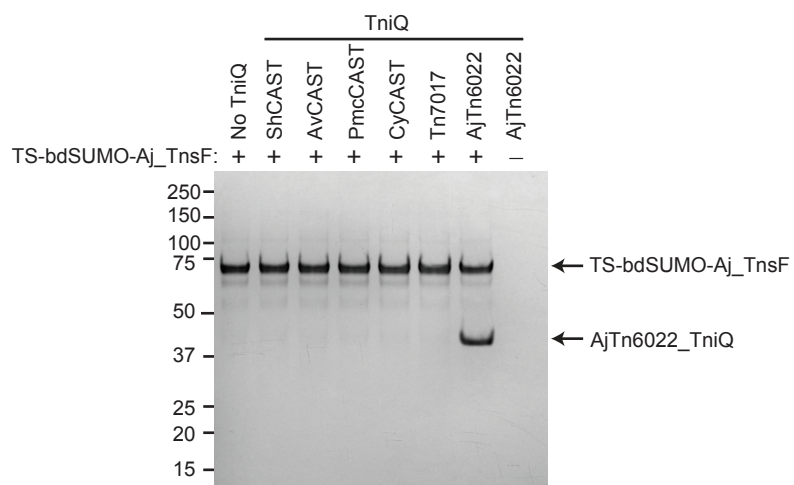

Supplement: mmc3.pdf [file mmc3.pdf]
